# Supplementary material for: Can We Compare the Health-Related Quality of Life of Childhood Cancer Survivors Following Photon and Proton Radiation Therapy? A Systematic Review
Source: MDPI journal article supplement (doi:10.3390/cancers14163937), 2022-08-15
Supplement: s1 [file s1]

**Supplementary Table S1.** Search strategy for systematic review applied in Medline.

|     |                                                                                                                                                                                                        |
|-----|--------------------------------------------------------------------------------------------------------------------------------------------------------------------------------------------------------|
| 1.  | exp Child/                                                                                                                                                                                             |
| 2.  | Pediatrics/                                                                                                                                                                                            |
| 3.  | (child* or pediatric* or paediatric*).mp.                                                                                                                                                              |
| 4.  | 1 or 2 or 3                                                                                                                                                                                            |
| 5.  | exp Neoplasms/                                                                                                                                                                                         |
| 6.  | (cancer* or tumor* or tumour* or oncolog* or neoplas* or carcinoma* or malignan*).mp.                                                                                                                  |
| 7.  | 5 or 6                                                                                                                                                                                                 |
| 8.  | (quality of life or QoL or survivorship or wellness).mp.                                                                                                                                               |
| 9.  | "Quality of Life"/                                                                                                                                                                                     |
| 10. | 8 or 9                                                                                                                                                                                                 |
| 11. | patient reported outcome measures/<br>(patient reported outcome* or patient reported outcome measure* or self report* or self-report* or self-rate or self                                             |
| 12. | rate* or proxy-rate* or proxy or child report* or child-report* or parent-proxy or questionnaire* or survey* or<br>validated instrument*).mp.                                                          |
| 13. | 11 or 12                                                                                                                                                                                               |
| 14. | exp Radiotherapy/                                                                                                                                                                                      |
| 15. | (proton* or proton therapy or proton beam therapy or radiation or radiation therapy or radiotherapy or X-ray<br>therapy or xray therapy or particle therapy or chemoradiotherapy or external beam).mp. |
| 16. | 14 or 15                                                                                                                                                                                               |
| 17. | 4 and 7 and 10 and 13 and 16                                                                                                                                                                           |
| 18. | limit 17 to (english language and yr="2000 -Current")                                                                                                                                                  |

**Supplementary Table S2.** Quality assessment criteria table results

| <b>Criteria</b>                                                                                                                                 | <b>Yes (%)</b> | <b>Partial (%)</b> | <b>No (%)</b> |
|-------------------------------------------------------------------------------------------------------------------------------------------------|----------------|--------------------|---------------|
| 1. Question/objective sufficiently described?                                                                                                   | 100.0          | 0.0                | 0.0           |
| 2. Study design evident and appropriate?                                                                                                        | 90.0           | 10.0               | 0.0           |
| 3. Method of subject/comparison group selection or source of information/input variables described and appropriate?                             | 93.3           | 6.7                | 0.0           |
| 4. Subject (and comparison group, if applicable) characteristics sufficiently described?                                                        | 73.4           | 23.3               | 3.3           |
| 5. If interventional and random allocation was possible, was it described?                                                                      | n/a            | n/a                | n/a           |
| 6. If interventional and blinding of investigators was possible, was it reported?                                                               | n/a            | n/a                | n/a           |
| 7. If interventional and blinding of subjects was possible, was it reported?                                                                    | n/a            | n/a                | n/a           |
| 8. Outcome and (if applicable) exposure measure(s) well defined and robust to measurement/misclassification bias? Means of assessment reported? | 55.0           | 41.7               | 3.3           |
| 9. Sample size appropriate?                                                                                                                     | 21.7           | 43.3               | 35.0          |
| 10. Analytic methods described/justified and appropriate?                                                                                       | 68.3           | 15.0               | 16.7          |
| 11. Some estimate of variance is reported for the main results?                                                                                 | 80.0           | 16.7               | 3.3           |
| 12. Controlled for confounding?                                                                                                                 | 28.3           | 41.7               | 30.0          |
| 13. Results reported in sufficient detail?                                                                                                      | 50.0           | 35.0               | 15.0          |
| 14. Conclusions supported by the results?                                                                                                       | 96.7           | 3.3                | 0.0           |

Assessment of criterion were informed by agreement with SISAQOL recommendations. Sufficient sample size was defined as 50 or more participants. Partial sufficiency of sample size was 30-50 participants. Insufficient sample size was defined as below 30 participants.
